# Supplementary material for: pTDP-43 levels correlate with cell type specific molecular alterations in the prefrontal cortex of C9orf72 ALS/FTD patients
Source: PubMed Central journal article supplement — bioRxiv. 2024 Jun 13:2023.01.12.523820. Originally published 2023 Jan 13. Preprint. [Version 2] doi: 10.1101/2023.01.12.523820 (PMC9882184; doi:10.1101/2023.01.12.523820), 2024-06-13
Supplement: NIHPP2023.01.12.523820v1-supplement-1.pdf [file NIHPP2023.01.12.523820v1-supplement-1.pdf]

## Supplementary Figure

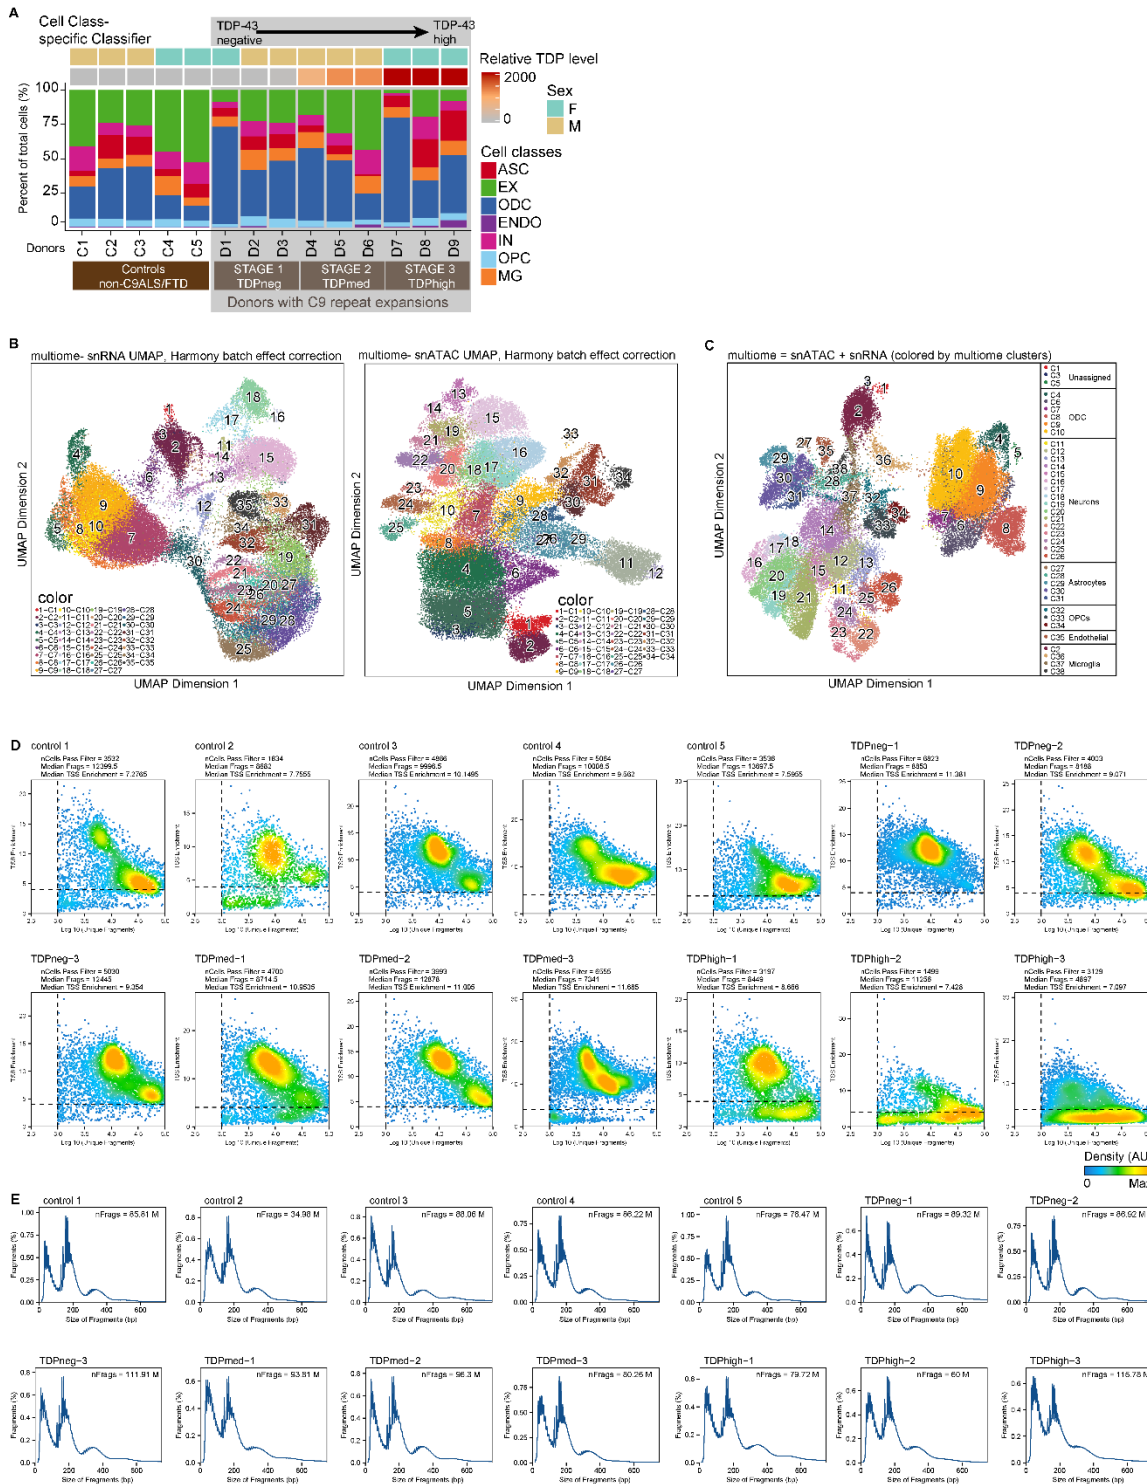

**Fig. S1. Confirmation of performance using paired snATAC-seq and snRNA-seq data from the same cell of all donor samples.** (A) *C9orf72* ALS/FTD cases were staged by pTDP-43 abundance and the proportions of major cell classes are shown. (B) UMAP visualizations of iterative LSI of snRNA-seq (left) and iterative LSI of snATAC-seq (right). (C) Iterative LSI of combined snATAC-seq and snRNA-seq. Cells are colored based on clusters identified in each iterative LSI. (D) Quality control metrics for the snATAC-seq dataset showing the TSS enrichment score vs unique nuclear fragments per cell. (E) Fragment size distribution for cells in each sample passing ArchR QC thresholds.

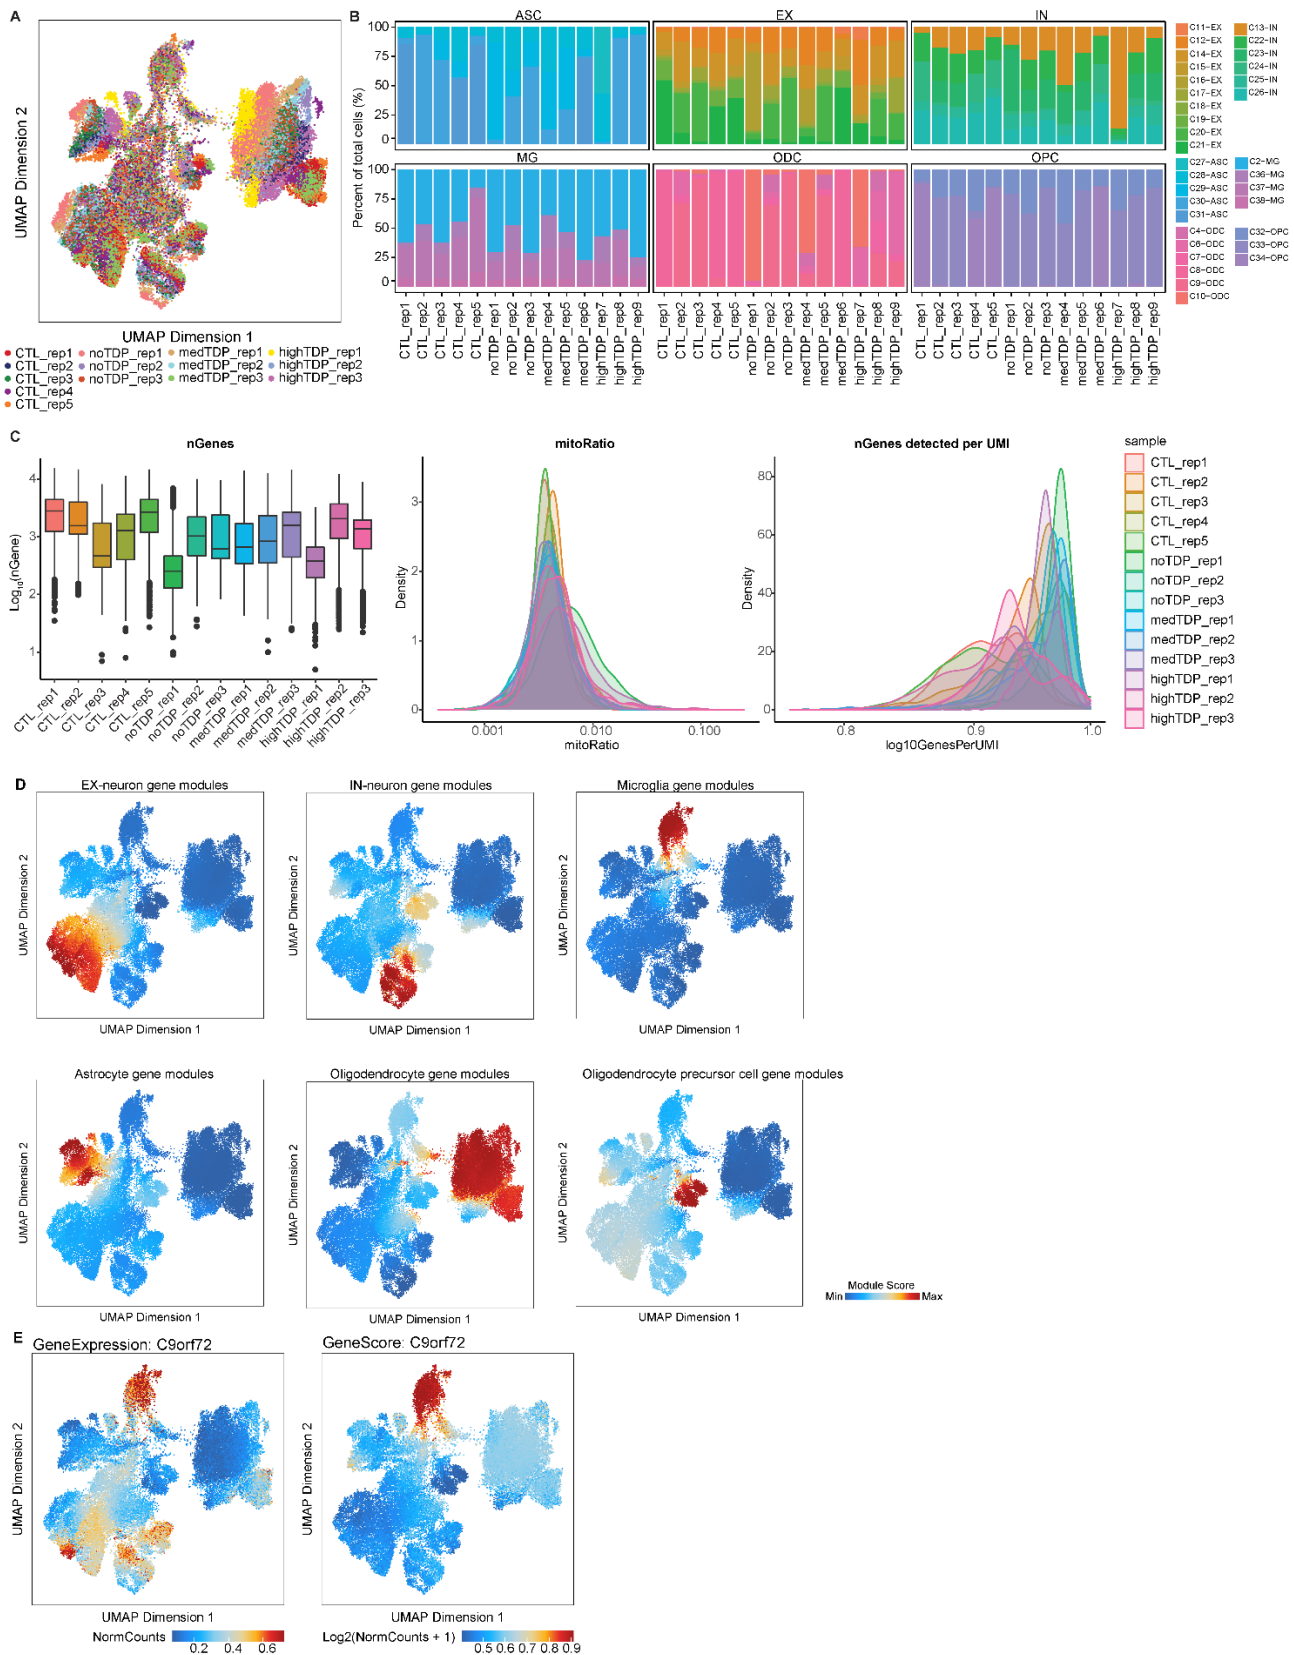

**Fig. S2. Quality control and gene module and gene activity scores.**

(A) snATAC-seq and snRNA-seq integrated UMAP colored by samples analyzed. (B) Proportion of all clusters per sample. (C) Quality control of snRNA-seq. (D) Gene module scores of major cell types. (E) Gene activity score and gene expression of the *C9orf72* gene.



## **Supplementary Tables**

**Table S1.** Sample metadata.

**Table S2.** Cellranger-arc quality control data for each sample, including both the snATAC-seq and snRNA-seq libraries.

**Table S3.** List of marker genes for each cell cluster.

**Table S4.** List of differentially expressed genes and differential chromatin accessible regions and gene ontology analysis of neuronal and nonneuronal common differentially expressed genes.

**Table S5.** Analysis of differentially expressed genes after removal of ambient RNA using SoupX.

**Table S6.** List of differentially expressed genes enriched for mitochondria-related ontology terms

**Table S7.** List of WGCNA module eigengenes found in excitatory and inhibitory neuron clusters.
